# Supplementary material
Source: PubMed Central journal article supplement (PMC4866918)
Supplement: supp_4.1.E48_2015-0111-STROBE_statement.pdf [file supp_4.1.E48_2015-0111-STROBE_statement.pdf]

**Appendix 1** (as supplied by the authors): Checklist of recommendations for reporting of observational studies using the STROBE guidelines

|                              | <b>Item No</b> | <b>Recommendation</b>                                                                                                                                                                | <b>Reported</b>                            |
|------------------------------|----------------|--------------------------------------------------------------------------------------------------------------------------------------------------------------------------------------|--------------------------------------------|
| <b>Title and abstract</b>    | 1              | (a) Indicate the study's design with a commonly used term in the title or the abstract                                                                                               | Abstract                                   |
|                              |                | (b) Provide in the abstract an informative and balanced summary of what was done and what was found                                                                                  | Abstract                                   |
| <b>Introduction</b>          |                |                                                                                                                                                                                      |                                            |
| Background/rationale         | 2              | Explain the scientific background and rationale for the investigation being reported                                                                                                 | Introduction                               |
| Objectives                   | 3              | State specific objectives, including any prespecified hypotheses                                                                                                                     | Introduction                               |
| <b>Methods</b>               |                |                                                                                                                                                                                      |                                            |
| Study design                 | 4              | Present key elements of study design early in the paper                                                                                                                              | Methods                                    |
| Setting                      | 5              | Describe the setting, locations, and relevant dates, including periods of recruitment, exposure, follow-up, and data collection                                                      | Methods                                    |
| Participants                 | 6              | (a) Give the eligibility criteria, and the sources and methods of selection of participants. Describe methods of follow-up                                                           | Methods                                    |
|                              |                | (b) For matched studies, give matching criteria and number of exposed and unexposed                                                                                                  | Not Applicable                             |
| Variables                    | 7              | Clearly define all outcomes, exposures, predictors, potential confounders, and effect modifiers. Give diagnostic criteria, if applicable                                             | Methods                                    |
| Data sources/<br>measurement | 8*             | For each variable of interest, give sources of data and details of methods of assessment (measurement). Describe comparability of assessment methods if there is more than one group | Methods                                    |
| Bias                         | 9              | Describe any efforts to address potential sources of bias                                                                                                                            | Methods                                    |
| Study size                   | 10             | Explain how the study size was arrived at                                                                                                                                            | Methods                                    |
| Quantitative variables       | 11             | Explain how quantitative variables were handled in the analyses. If applicable, describe which groupings were chosen and why                                                         | Methods, based on availability of the data |
| Statistical methods          | 12             | (a) Describe all statistical methods, including those used to control for confounding                                                                                                | Methods                                    |
|                              |                | (b) Describe any methods used to examine subgroups and interactions                                                                                                                  | Methods                                    |
|                              |                | (c) Explain how missing data were addressed                                                                                                                                          | Not Applicable                             |
|                              |                | (d) If applicable, explain how loss to follow-up was addressed                                                                                                                       | Not Applicable                             |
|                              |                | (e) Describe any sensitivity analyses                                                                                                                                                | Methods                                    |
| <b>Results</b>               |                |                                                                                                                                                                                      |                                            |

|                          |     |                                                                                                                                                                                                              |                |
|--------------------------|-----|--------------------------------------------------------------------------------------------------------------------------------------------------------------------------------------------------------------|----------------|
| Participants             | 13* | (a) Report numbers of individuals at each stage of study—eg numbers potentially eligible, examined for eligibility, confirmed eligible, included in the study, completing follow-up, and analysed            | Results        |
|                          |     | (b) Give reasons for non-participation at each stage                                                                                                                                                         | Not Applicable |
|                          |     | (c) Consider use of a flow diagram                                                                                                                                                                           | Not Applicable |
| Descriptive data         | 14* | (a) Give characteristics of study participants (eg demographic, clinical, social) and information on exposures and potential confounders                                                                     | Results        |
|                          |     | (b) Indicate number of participants with missing data for each variable of interest                                                                                                                          | Not Applicable |
|                          |     | (c) Summarise follow-up time (eg, average and total amount)                                                                                                                                                  | Not Applicable |
| Outcome data             | 15* | Report numbers of outcome events or summary measures over time                                                                                                                                               | Results        |
| Main results             | 16  | (a) Give unadjusted estimates and, if applicable, confounder-adjusted estimates and their precision (eg, 95% confidence interval). Make clear which confounders were adjusted for and why they were included | Results        |
|                          |     | (b) Report category boundaries when continuous variables were categorized                                                                                                                                    | Not Applicable |
|                          |     | (c) If relevant, consider translating estimates of relative risk into absolute risk for a meaningful time period                                                                                             | Not Applicable |
| Other analyses           | 17  | Report other analyses done—eg analyses of subgroups and interactions, and sensitivity analyses                                                                                                               | Results        |
| <b>Discussion</b>        |     |                                                                                                                                                                                                              |                |
| Key results              | 18  | Summarise key results with reference to study objectives                                                                                                                                                     | Discussion     |
| Limitations              | 19  | Discuss limitations of the study, taking into account sources of potential bias or imprecision. Discuss both direction and magnitude of any potential bias                                                   | Discussion     |
| Interpretation           | 20  | Give a cautious overall interpretation of results considering objectives, limitations, multiplicity of analyses, results from similar studies, and other relevant evidence                                   | Discussion     |
| Generalisability         | 21  | Discuss the generalisability (external validity) of the study results                                                                                                                                        | Discussion     |
| <b>Other information</b> |     |                                                                                                                                                                                                              |                |
| Funding                  | 22  | Give the source of funding and the role of the funders for the present study and, if applicable, for the original study on which the present article is based                                                | Footnotes      |
